# Supplementary material for: Knowledge, attitudes and beliefs about vaccination in primary healthcare workers involved in the administration of systematic childhood vaccines, Barcelona, 2016/17
Source: PubMed Central journal article supplement (PMC6373069; doi:10.2807/1560-7917.es.2019.24.6.1800117), 2019-02-07
Supplement: 1800117_CARRASCO_Supplement.pdf [file 1800117_CARRASCO_Supplement.pdf]

## Supplementary material

This supplementary material is hosted by *Eurosurveillance* as supporting information alongside the article *Knowledge, attitudes and beliefs about vaccination in primary healthcare workers involved in the administration of systematic childhood vaccines, Barcelona, 2016/17* on behalf of the authors who remain responsible for the accuracy and appropriateness of the content. The same standards for ethics, copyright, attributions and permissions as for the article apply. *Eurosurveillance* is not responsible for the maintenance of any links or email addresses provided therein.

**Supplementary table S1. Paediatric health professionals who responded 'late', 'doubts', or 'no' to vaccinating their own children, survey about vaccine knowledge, attitudes and beliefs, Barcelona, 2016/17 (n=277)**

|                        | <b>Late<br/>N (%)</b> | <b>No<br/>N (%)</b> | <b>Doubts<br/>N (%)</b> | <b>Missing values<br/>N (%)</b> |
|------------------------|-----------------------|---------------------|-------------------------|---------------------------------|
| Diphtheria             | 3 (1.1)               | 0                   | 0                       | 10 (3.6)                        |
| Tetanus                | 3 (1.1)               | 0                   | 0                       | 9 (3.2)                         |
| Whooping cough         | 2 (0.7)               | 0                   | 1 (0.4)                 | 10 (3.6)                        |
| Polio                  | 1 (0.4)               | 1 (0.4)             | 0                       | 10 (3.6)                        |
| <i>H. Influenzae b</i> | 2 (0.7)               | 2 (0.7)             | 0                       | 11 (4.0)                        |
| Hepatitis B            | 9 (3.2)               | 3 (1.1)             | 0                       | 12 (4.3)                        |
| <i>Meningococcus C</i> | 2 (0.7)               | 3 (1.1)             | 0                       | 10 (3.6)                        |
| Hepatitis A            | 13 (4.7)              | 5 (1.8)             | 1 (0.4)                 | 9 (3.2)                         |
| Measles                | 1 (0.4)               | 1 (0.4)             | 0                       | 10 (3.6)                        |
| Rubella                | 2 (0.7)               | 1 (0.4)             | 0                       | 10 (3.6)                        |
| Parotitis              | 1 (0.4)               | 1 (0.4)             | 0                       | 10 (3.6)                        |
| HPV                    | 7 (2.5)               | 28 (10.1)           | 8 (2.9)                 | 12 (4.3)                        |
| Varicella              | 13 (4.7)              | 19 (6.9)            | 10 (3.6)                | 13 (4.7)                        |
| <i>Pneumococcus</i>    | 7 (2.5)               | 10 (3.6)            | 1 (0.4)                 | 9 (3.2)                         |

**Supplementary table S2. Disease susceptibility perceived by paediatric health professionals, survey about vaccine knowledge, attitudes and beliefs, Barcelona, 2016/17 (n = 277)**

|                        | <b>Impossible<br/>N (%)</b> | <b>Unlikely<br/>N (%)</b> | <b>Neither<br/>probable nor<br/>improbable<br/>N (%)</b> | <b>Probable<br/>N (%)</b> | <b>Very probable<br/>N (%)</b> | <b>DK/NR<br/>N (%)</b> |
|------------------------|-----------------------------|---------------------------|----------------------------------------------------------|---------------------------|--------------------------------|------------------------|
| Diphtheria             | 2 (0.7)                     | 152 (54.9)                | 20 (7.2)                                                 | 77 (27.8)                 | 16 (5.8)                       | 10 (3.6)               |
| Tetanus                | 3 (1.1)                     | 88 (31.8)                 | 35 (12.6)                                                | 104 (37.5)                | 36 (13.0)                      | 11 (4.0)               |
| Whooping cough         | 1 (0.4)                     | 16 (5.8)                  | 16 (5.8)                                                 | 131 (47.3)                | 105 (37.9)                     | 8 (2.9)                |
| Polio                  | 13 (4.7)                    | 170 (61.4)                | 22 (7.9)                                                 | 52 (18.8)                 | 8 (2.9)                        | 12 (4.3)               |
| <i>H. Influenzae b</i> | 2 (0.7)                     | 58 (20.9)                 | 47 (17.0)                                                | 127 (45.9)                | 25 (9.0)                       | 18 (6.5)               |
| Hepatitis B            | 2 (0.7)                     | 79 (28.5)                 | 41 (14.8)                                                | 120 (43.3)                | 24 (8.7)                       | 11 (4.0)               |
| <i>Meningococcus C</i> | 0                           | 93 (33.6)                 | 50 (18.1)                                                | 109 (39.4)                | 12 (4.3)                       | 12 (4.3)               |
| Hepatitis A            | 1 (0.4)                     | 65 (23.5)                 | 48 (17.3)                                                | 112 (40.4)                | 36 (13.0)                      | 15 (5.4)               |
| Measles                | 1 (0.4)                     | 64 (23.1)                 | 38 (13.7)                                                | 132 (47.7)                | 35 (12.6)                      | 7 (2.5)                |
| Rubella                | 5 (1.8)                     | 90 (32.5)                 | 44 (15.9)                                                | 100 (36.1)                | 28 (10.1)                      | 10 (3.6)               |
| Parotitis              | 1 (0.4)                     | 48 (17.3)                 | 33 (11.9)                                                | 146 (52.7)                | 40 (14.4)                      | 9 (3.3)                |
| HPV                    | 2 (0.7)                     | 27 (9.7)                  | 32 (11.5)                                                | 129 (46.6)                | 69 (24.9)                      | 18 (6.5)               |
| Varicella              | 2 (0.7)                     | 5 (1.8)                   | 3 (1.1)                                                  | 68 (24.5)                 | 193 (69.7)                     | 6 (2.2)                |
| <i>Pneumococcus</i>    | 0                           | 32 (11.5)                 | 44 (15.9)                                                | 141 (50.9)                | 50 (18.1)                      | 10 (3.6)               |

DK/NR = Don't know/No Response

**Supplementary table S3. Disease severity perceived by paediatric health professionals, survey about vaccine knowledge, attitudes and beliefs, Barcelona, 2016/17 (n = 277)**

|                        | <b>Not at all severe<br/>N (%)</b> | <b>Not severe<br/>N (%)</b> | <b>Somewhat severe<br/>N (%)</b> | <b>Severe<br/>N (%)</b> | <b>Very severe<br/>N (%)</b> | <b>DK/NR<br/>N (%)</b> |
|------------------------|------------------------------------|-----------------------------|----------------------------------|-------------------------|------------------------------|------------------------|
| Diphtheria             | 0                                  | 4 (1.4)                     | 25 (9.0)                         | 88 (31.8)               | 153 (55.2)                   | 7 (2.5)                |
| Tetanus                | 0                                  | 2 (0.7)                     | 15 (5.4)                         | 83 (30.0)               | 168 (60.6)                   | 9 (3.2)                |
| Whooping cough         | 3 (1.1)                            | 74 (26.7)                   | 89 (32.1)                        | 75 (27.1)               | 30 (10.8)                    | 6 (2.2)                |
| Polio                  | 0                                  | 5 (1.8)                     | 15 (5.4)                         | 75 (27.1)               | 172 (62.1)                   | 10 (3.6)               |
| <i>H. Influenzae b</i> | 2 (0.7)                            | 24 (8.7)                    | 82 (29.6)                        | 104 (37.5)              | 52 (18.8)                    | 13 (4.7)               |
| Hepatitis B            | 1 (0.4)                            | 12 (4.3)                    | 57 (20.6)                        | 131 (47.3)              | 68 (24.5)                    | 8 (2.9)                |
| <i>Meningococcus C</i> | 0                                  | 3 (1.1)                     | 18 (6.5)                         | 74 (26.7)               | 174 (62.8)                   | 8 (2.9)                |
| Hepatitis A            | 4 (1.4)                            | 85 (30.7)                   | 109 (39.4)                       | 56 (20.2)               | 16 (5.8)                     | 7 (2.5)                |
| Measles                | 2 (0.7)                            | 49 (17.7)                   | 101 (36.5)                       | 90 (32.5)               | 28 (10.1)                    | 6 (2.2)                |
| Rubella                | 7 (2.5)                            | 86 (31.0)                   | 98 (35.4)                        | 52 (18.8)               | 23 (8.3)                     | 11 (4.0)               |
| Parotitis              | 4 (1.4)                            | 93 (33.6)                   | 112 (40.4)                       | 49 (17.7)               | 11 (4.0)                     | 8 (2.9)                |
| Varicella              | 15 (5.4)                           | 157 (56.7)                  | 73 (26.4)                        | 21 (7.6)                | 5 (1.8)                      | 6 (2.2)                |
| <i>Pneumococcus</i>    | 2 (0.7)                            | 19 (6.9)                    | 74 (26.7)                        | 103 (37.2)              | 71 (25.6)                    | 8 (2.9)                |

DK/NR = Don't know/No Response

**Supplementary table S4. Vaccine safety perceived by paediatric health professionals, survey about vaccine knowledge, attitudes and beliefs, Barcelona, 2016/17 (n=277)**

|                        | <b>Dangerous<br/>N (%)</b> | <b>Unsafe<br/>N (%)</b> | <b>Safe<br/>N (%)</b> | <b>Very safe<br/>N (%)</b> | <b>Totally safe<br/>N (%)</b> | <b>DK/NR<br/>N (%)</b> |
|------------------------|----------------------------|-------------------------|-----------------------|----------------------------|-------------------------------|------------------------|
| Diphtheria             | 0                          | 0                       | 55 (19.9)             | 123 (44.4)                 | 87 (31.4)                     | 12 (4.3)               |
| Tetanus                | 0                          | 0                       | 56 (20.2)             | 123 (44.4)                 | 88 (31.8)                     | 10 (3.6)               |
| Whooping cough         | 0                          | 5 (1.8)                 | 63 (22.7)             | 121 (43.7)                 | 78 (28.2)                     | 10 (3.6)               |
| Polio                  | 0                          | 0                       | 54 (19.5)             | 128 (46.2)                 | 83 (30.0)                     | 12 (4.3)               |
| <i>H. Influenzae b</i> | 0                          | 0                       | 62 (22.4)             | 119 (43.0)                 | 84 (30.3)                     | 12 (4.3)               |
| Hepatitis B            | 0                          | 0                       | 59 (21.3)             | 124 (44.8)                 | 83 (30.0)                     | 11 (4.0)               |
| <i>Meningococcus C</i> | 0                          | 1 (0.4)                 | 56 (20.2)             | 124 (44.8)                 | 80 (28.9)                     | 16 (5.8)               |
| Hepatitis A            | 0                          | 1 (0.4)                 | 56 (20.2)             | 122 (44.0)                 | 82 (29.6)                     | 16 (5.8)               |
| Measles                | 0                          | 1 (0.4)                 | 66 (23.8)             | 123 (44.4)                 | 76 (27.4)                     | 11 (4.0)               |
| Rubella                | 0                          | 0                       | 66 (23.8)             | 122 (44.0)                 | 77 (27.8)                     | 12 (4.3)               |
| Parotitis              | 0                          | 2 (0.7)                 | 65 (23.5)             | 120 (43.3)                 | 76 (27.4)                     | 14 (5.1)               |
| HPV                    | 1 (0.4)                    | 14 (5.1)                | 81 (29.2)             | 103 (37.2)                 | 55 (19.9)                     | 23 (8.3)               |
| Varicella              | 0                          | 5 (1.8)                 | 73 (26.4)             | 120 (43.3)                 | 67 (24.2)                     | 12 (4.3)               |
| <i>Pneumococcus</i>    | 0                          | 0                       | 63 (22.7)             | 120 (43.3)                 | 79 (28.5)                     | 15 (5.4)               |

DK/NR = Don't know/No Response

**Supplementary table S5. Vaccine effectiveness perceived by paediatric health professionals, survey about vaccine knowledge, attitudes and beliefs, Barcelona, 2016/17 (n=277)**

|                        | <b>No protection<br/>N (%)</b> | <b>Little<br/>protection<br/>N (%)</b> | <b>Some<br/>protection<br/>N (%)</b> | <b>Protects<br/>N (%)</b> | <b>Protects A lot<br/>N (%)</b> | <b>DK/NR<br/>N (%)</b> |
|------------------------|--------------------------------|----------------------------------------|--------------------------------------|---------------------------|---------------------------------|------------------------|
| Diphtheria             | 0                              | 0                                      | 3 (1.1)                              | 139 (50.2)                | 126 (45.5)                      | 9 (3.2)                |
| Tetanus                | 0                              | 0                                      | 1 (0.4)                              | 133 (48.0)                | 134 (48.4)                      | 9 (3.2)                |
| Whooping cough         | 0                              | 22 (7.9)                               | 93 (33.6)                            | 117 (42.2)                | 36 (13.0)                       | 9 (3.2)                |
| Polio                  | 0                              | 1 (0.4)                                | 1 (0.4)                              | 128 (46.2)                | 137 (49.5)                      | 10 (3.6)               |
| <i>H. Influenzae b</i> | 0                              | 1 (0.4)                                | 13 (4.7)                             | 159 (57.4)                | 90 (32.5)                       | 14 (5.1)               |
| Hepatitis B            | 0                              | 1 (0.4)                                | 17 (6.1)                             | 149 (53.8)                | 101 (36.5)                      | 9 (3.2)                |
| <i>Meningococcus C</i> | 0                              | 0                                      | 10 (3.6)                             | 162 (58.5)                | 89 (32.1)                       | 16 (5.8)               |
| Hepatitis A            | 0                              | 1 (0.4)                                | 10 (3.6)                             | 159 (57.4)                | 95 (34.3)                       | 11 (4.0)               |
| Measles                | 0                              | 1 (0.4)                                | 22 (7.9)                             | 157 (56.7)                | 88 (31.8)                       | 8 (2.9)                |
| Rubella                | 0                              | 1 (0.4)                                | 14 (5.1)                             | 155 (56.0)                | 96 (34.7)                       | 11 (4.0)               |
| Parotitis              | 0                              | 2 (0.7)                                | 51 (18.4)                            | 150 (54.2)                | 64 (23.1)                       | 10 (3.6)               |
| HPV                    | 0                              | 6 (2.2)                                | 59 (21.3)                            | 155 (56.0)                | 28 (10.1)                       | 29 (10.5)              |
| Varicella              | 0                              | 6 (2.2)                                | 59 (21.3)                            | 157 (56.7)                | 44 (15.9)                       | 11 (4.0)               |
| <i>Pneumococcus</i>    | 0                              | 1 (0.4)                                | 19 (6.9)                             | 187 (67.5)                | 59 (21.3)                       | 11 (4.0)               |

DK/NR = Don't know/No response
